# Supplementary material for: A Gd-based borate–carbonate framework exhibiting a large magnetocaloric effect at a low magnetic field
Source: Royal Society of Chemistry journal article supplement (doi:10.1039/d1dt02624k), 2021-01-01
Supplement: d1dt02624k1.pdf [file d1dt02624k1.pdf]

## **Supporting Information**

### **A Gd-based Borate-Carbonate Framework, Exhibiting a Large Magnetocaloric Effect at Low Magnetic Field**

Bo-Liang Liu, Qiao-Fei Xu, La-Sheng Long,\* and Lan-Sun Zheng

Collaborative Innovation Center of Chemistry for Energy Materials, State Key Laboratory of Physical Chemistry of Solid Surfaces and Department of Chemistry, College of Chemistry and Chemical Engineering, Xiamen University, Xiamen, 361005, China.

## Experimental Section

### Materials and Physical Measurements.

All materials and reagents were commercially available and used without further purification.

Single crystal data of **1** were collected using an Agilent Technologies Super Nova four-circle diffractometer with monochromatic Cu K $\alpha$  radiation ( $\lambda = 1.54184$  Å). Data reduction and absorption correction were applied by using the multi-scan program. The structures were determined and refined using full-matrix least-squares based on  $F^2$  with SHELXS-97 and SHELXL-97<sup>1</sup> within Olex2.<sup>2</sup> CCDC number is 2073758 for compound **1**. Crystal data and refinement details are presented in Table S3. Selected bond distances and bond angles are listed in Table S4. The data can be obtained free of charge from the Cambridge Crystallographic Data Centre.

Powder X-ray diffraction data (PXRD) was collected on a Rigaku Ultima IV powder X-ray diffractometer (Cu K $\alpha$ ,  $\lambda = 1.54184$  Å) in the  $2\theta$  range of 10-70° at 300 K. Thermogravimetric analysis (TGA) curve was conducted on an SDT\_Q600 thermal analyzer at a rate of 10 °C per minute up to 800 °C under a constant nitrogen gas. Infrared spectra were recorded on a Nicolet iS50 FT-IR spectrophotometer with pressed KBr pellets. Magnetic measurement was carried out using a Quantum Design MPMS superconducting quantum interference device (SQUID).

### Synthesis of $\text{GdB(OH)}_4\text{CO}_3$ (**1**)

Single crystal of **1** was synthesized by a mixture of  $\text{Gd(NO}_3)_3 \cdot 6\text{H}_2\text{O}$  (0.451 g, 1.0 mmol), boric acid (0.247 g, 4 mmol) and ammonium carbonate (0.144 g, 1.5 mmol) dissolved in 10 mL deionized water. The resulting solution was stirred for 30 min before transferred into a Teflon-lined autoclave 200 °C for 3 days and cooled down to room temperature at a rate of 3 °C h<sup>-1</sup>. Colorless crystals were obtained in 50% yield based on  $\text{Gd}^{3+}$ .

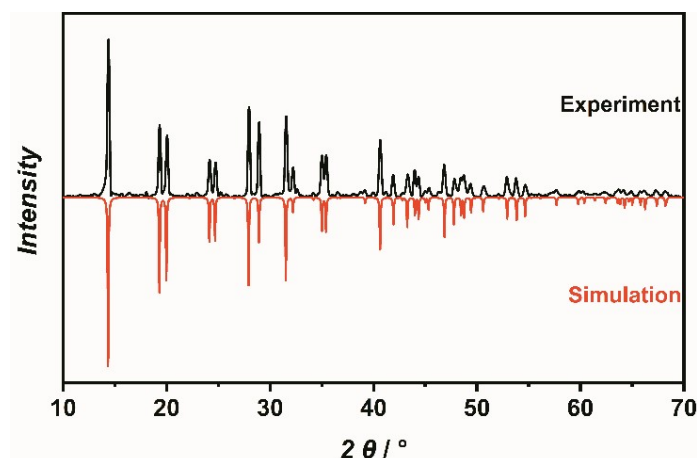

**Fig. S1.** PXRD curve for **1**.

The PXRD patterns are consistent with the simulated ones based on the single-crystal structure determinations, suggesting the phase purity of **1**.

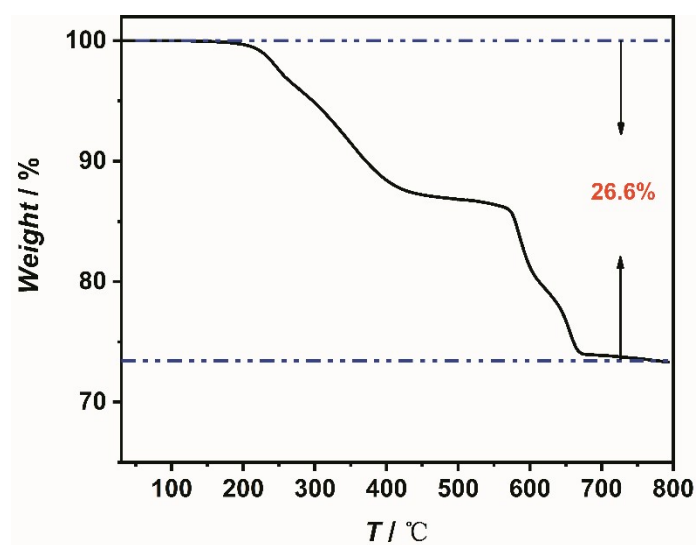

**Fig. S2.** TGA curve of **1**.

The TGA curve of **1** was carried out under  $\text{N}_2$  atmosphere. With temperature rising, two obvious endothermic steps are observed. The first step is attributed to the loss of two  $\text{H}_2\text{O}$  from tetrahydroxyborates, and the second is ascribed to the departure of  $\text{CO}_2$  from carbonates. By the end of 800 °C, the weight loss is up to 26.6 %, which matches the theoretical value 27.0 % calculated for the weight loss of two  $\text{H}_2\text{O}$  and one  $\text{CO}_2$ , indicating that the residue is  $\text{GdBO}_3$  at 800 °C.

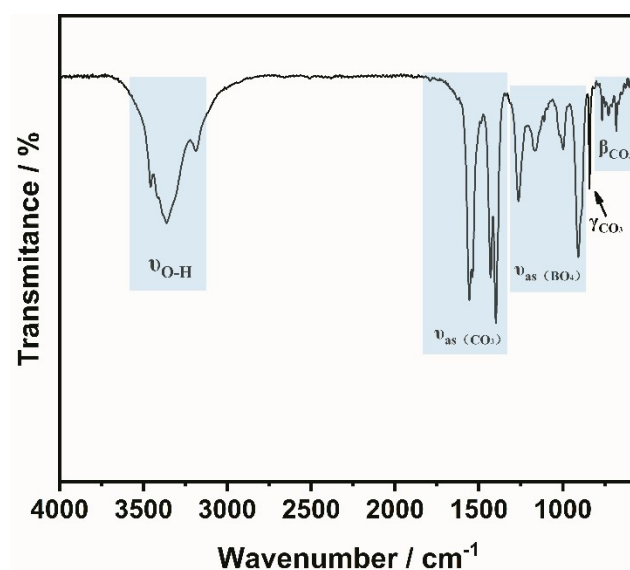

**Fig. S3.** IR spectra in 4000-530  $\text{cm}^{-1}$  for **1**

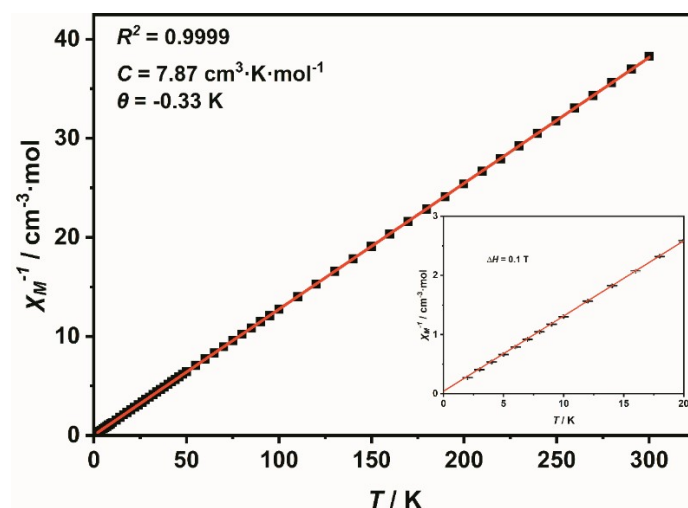

**Fig. S4.** The  $\chi_m^{-1}$  vs.  $T$  plot of **1** in the temperature range of 2–300 K. The red solid line is the best-fit according to the Curie-Weiss law. Inserted: enlarged figure in the temperature range from 2 K to 20 K with error bar. The positive intercept of y axial suggests the antiferromagnetic coupling interaction in **1**.

**Table S1.** BVS calculations for oxygen atoms in tetrahydroxyborate.

| Atom | bond       | $R_{ij}$ | $R_0$ | $S_{ij}$        |
|------|------------|----------|-------|-----------------|
| O1   | Gd–O       | 2.500    | 2.031 | 0.282           |
|      | B–O        | 1.476    | 1.371 | 0.753           |
|      | Total      |          |       | 1.035           |
|      | Assignment |          |       | OH <sup>–</sup> |
| O2   | Gd–O       | 2.487    | 2.031 | 0.292           |
|      | B–O        | 1.478    | 1.371 | 0.749           |
|      | Total      |          |       | 1.041           |
|      | Assignment |          |       | OH <sup>–</sup> |

The bond valence sum (BVS)<sup>3</sup> analysis was used to determine the oxidation states of oxygen atoms in compound **1**. The calculation formula is  $S_{ij} = \exp[(R_0 - R_{ij})/b]$ , in which  $S_{ij}$  is the valence of the individual bond,  $R_{ij}$  is the observed bond length,  $R_0$  is a constant depended upon the bonded elements, and  $b$  is a constant of 0.37. As shown in **Table S1**, the total BVS values of O atoms are very close to the state of +1, for which we identify the states of both O atoms are assigned to hydroxyl groups.

**Table S2.** The Continuous Shape Measurements (CShM)<sup>4</sup> of **1**.

|                         | Gd           |
|-------------------------|--------------|
| DP-10 ( $D_{8h}$ )      | 33.433       |
| EPY-10 ( $C_{9v}$ )     | 24.528       |
| OBPY-10 ( $D_{8h}$ )    | 15.660       |
| PPR-10 ( $D_{5h}$ )     | 12.731       |
| PAPR-10 ( $D_{5d}$ )    | 13.562       |
| JBCCU-10 ( $D_{4h}$ )   | 10.557       |
| JBCSAPR-10 ( $D_{4d}$ ) | 5.142        |
| JMBIC-10 ( $C_{2v}$ )   | 9.328        |
| JATDI-10 ( $C_{3v}$ )   | 17.680       |
| JSPC-10 ( $C_{2v}$ )    | <b>2.539</b> |
| SDD-10 ( $D_2$ )        | 4.835        |
| TD-10 ( $C_{2v}$ )      | 3.941        |
| HD-10 ( $D_{4h}$ )      | 9.320        |

DP-10 = Decagon; EPY-10 = Enneagonal pyramid; OBPY-10 = Octagonal bipyramid; PPR-10 = Pentagonal prism; PAPR-10 = Pentagonal antiprism; JBCCU-10 = Bicapped cube; JBCSAPR-10 = Bicapped square antiprism; JMBIC-10 = Metabidiminshed icosahedron; JATDI-10 = Augmented tridiminshed icosahedron; JSPC-10 = Sphenocorona; SDD-10 = Staggered Dodecahedron; TD-10 = Tetradecehedron; HD-10 = Hexadecehedron.

**Table S3.** Crystal data for **1**.

| Compound                                                        | <b>1</b>                          |
|-----------------------------------------------------------------|-----------------------------------|
| Formula                                                         | CH <sub>4</sub> BGdO <sub>7</sub> |
| Formula weight                                                  | 296.1                             |
| Temperature/K                                                   | 100                               |
| Crystal system                                                  | orthorhombic                      |
| Space group                                                     | <i>Pbcm</i>                       |
| <i>a</i> /Å                                                     | 6.1685 (4)                        |
| <i>b</i> /Å                                                     | 8.8840 (6)                        |
| <i>c</i> /Å                                                     | 9.1876 (7)                        |
| <i>V</i> /Å <sup>3</sup>                                        | 503.49 (6)                        |
| <i>Z</i>                                                        | 4                                 |
| <i>D<sub>c</sub></i> /g cm <sup>-3</sup>                        | 3.906                             |
| <i>μ</i> /mm <sup>-1</sup>                                      | 85.22                             |
| <i>θ</i> /°                                                     | 7.7780-72.7490                    |
| Observed reflections                                            | 1745                              |
| <i>F</i> (000)                                                  | 540                               |
| GOOF                                                            | 1.154                             |
| <i>R</i> <sub>1</sub> [ <i>I</i> > 2σ( <i>I</i> )] <sup>a</sup> | 0.0467                            |
| <i>wR</i> <sub>2</sub> (All data) <sup>b</sup>                  | 0.1426                            |

$$^a R_1 = \sum ||F_o| - |F_c|| / \sum |F_o| \quad ^b wR_2 = \{\sum[w(F_o^2 - F_c^2)^2] / \sum[w(F_o^2)^2]\}^{1/2}$$

**Table S4.** Selected bond distances (Å) and bond angles (°) of **1**.

|                          |           |                                         |            |
|--------------------------|-----------|-----------------------------------------|------------|
| Gd1—O2 <sup>i</sup>      | 2.487 (4) | Gd1—O3 <sup>v</sup>                     | 2.851 (6)  |
| Gd1—O2 <sup>ii</sup>     | 2.487 (4) | Gd1—O4 <sup>iv</sup>                    | 2.418 (2)  |
| Gd1—O1                   | 2.500 (4) | Gd1—O4 <sup>v</sup>                     | 2.418 (2)  |
| Gd1—O1 <sup>iii</sup>    | 2.500 (4) | O2—B1                                   | 1.478 (6)  |
| Gd1—O3                   | 2.341 (5) | O1—B1                                   | 1.476 (6)  |
| Gd1—O3 <sup>iv</sup>     | 2.851 (6) | O3—C1                                   | 1.259 (7)  |
| Gd1—O3 <sup>iii</sup>    | 2.341 (5) | O4—C1                                   | 1.287 (11) |
| Gd1—O3—Gd1 <sup>iv</sup> | 117.3(2)  | Gd1 <sup>iv</sup> —O4—Gd1 <sup>vi</sup> | 143.5(3)   |

Symmetry codes: (i)  $x+1, y, z$ ; (ii)  $x+1, -y+1/2, -z-1$ ; (iii)  $x, -y+1/2, -z-1$ ; (iv)  $-x-2, -y+1, -z-1$ ; (v)  $-x-2, y-1/2, z$ ; (vi)  $-x-2, -y+1, z-1/2$

## Reference

- (1) G. M. Sheldrick, *Acta Cryst.*, 2015, **71**, 3–8.
- (2) O. V. Dolomanov, L. J. Bourhis, R. J. Gildea, J. A. K. Howard and H. Puschmann, *J. Appl. Cryst.*, 2009, **42**, 339–341.
- (3) I. D. Brown and D. Altermatt, *Acta Cryst. B*, 1985, **41**, 244–247.
- (4) S. Alvarez, P. Alemany, D. Casanova, J. Cirera, M. Llunell and D. Avnir, *Coord. Chem. Rev.*, 2005, **249**, 1693–1708.
